# Supplementary material for: Foliar application of abscisic acid mitigates cadmium stress and increases food safety of cadmium-sensitive lettuce (Lactuca sativa L.) genotype
Source: PeerJ. 2020 Jul 2;8:e9270. doi: 10.7717/peerj.9270 (PMC7335501; doi:10.7717/peerj.9270)
Supplement: Supplemental Information 1 — H2O2, MDA, SOD, POD, CAT, Chlorophyll content, Pn, Tr, Gs, Ci, RWC, Nutrient elements, Cadmium contents and plant biomass indexes, as influenced by the treatments. [file peerj-08-9270-s001.xlsx]

## Sheet: H2O2
	RAW DATA
	H2O2 IN ROOT
	TRT	R1	R2	R3	STD	X
	Control	1.7	1.9	1.6	0.152753	1.7
	CdCl2	4.8	5.1	4.9	0.152753	4.9	65.3% greater than control
	ABA	1.8	1.9	2	0.1	1.9	10.5% greater than control
	Fluridone	3.2	3.4	3.6	0.2	3.4	50% greater than control
	CdCl2+ABA	2.2	2.1	2	0.1	2.1	19% greater than control
	H2O2 IN LEAF
	TRT	R1	R2	R3	STD	X
	Control	1.6	1.4	1.5	0.1	1.5
	CdCl2	4.3	4.5	4.1	0.2	4.3	65.1% > control
	ABA	1.7	1.9	1.9	0.11547	1.8	5.6% > control
	Fluridone	2.9	3.1	3.2	0.152753	3.1	51.6% > control
	CdCl2+ABA	1.9	2	1.8	0.1	1.9	21.1% > control

## Sheet: MDA
	RAW DATA
	MDA IN LEAF
	TRT	R1	R2	R3	STD
	Control	0.13	0.14	0.16	0.015275
	CdCl2	0.24	0.26	0.25	0.01
	ABA	0.14	0.15	0.13	0.01
	Fluridone	0.17	0.18	0.19	0.01
	CdCl2+ABA	0.17	0.18	0.17	0.005774
	MDA IN ROOT
	TRT	R1	R2	R3	STD
	Control	0.16	0.15	0.16	0.005774
	CdCl2	0.31	0.29	0.32	0.015275
	ABA	0.16	0.15	0.14	0.01
	Fluridone	0.18	0.2	0.19	0.01
	CdCl2+ABA	0.21	0.22	0.19	0.015275

## Sheet: SOD
		RAW DATA
		SOD LEAF
		TRT	R1	R2	R3	STD	Mean
	Control	1	818.8	821.4	820.6	1.33167	820.267
	Cd	2	766.8	761.9	768.2	3.30807	765.633
	Cd+ABA	3	788.8	782.4	784.6	3.25167	785.267
	ABA	4	814.8	812.6	818.8	3.14325	815.4
	FLU	5	760.7	759.9	763.2	1.72143	761.267
		SOD ROOT
		TRT	R1	R2	R3	STD	Mean
	Control	1	822.4	819.8	816.9	2.75136	819.7
	Cd	2	628.4	622.8	625.9	2.80535	625.7
	Cd+ABA	3	768.8	772.4	770.8	1.8037	770.667
	ABA	4	820.9	818.2	814.8	3.05669	817.967
	FLU	5	620.8	618.6	619.2	1.13725	619.533

## Sheet: POD
		RAW DATA
		PODLEAF
		TRT	R1	R2	R3	STD	Mean
	Control	1	72.4	76.6	74.4	2.10079	74.4667
	Cd	2	94.2	92.6	89.9	2.17332	92.2333
	Cd+ABA	3	79.2	78.8	76.4	1.51438	78.1333
	ABA	4	71.2	70.6	73.1	1.30512	71.6333
	FLU	5	90.8	92.8	91.2	1.0583	91.6
		PODROOT
		TRT	R1	R2	R3	STD	Mean
	Control	1	78.4	81.2	83.4	2.50599	81
	Cd	2	102.8	104.6	102.4	1.17189	103.3
	Cd+ABA	3	82.1	84.2	87.6	2.77549	84.6
	ABA	4	79.9	80.4	82.1	1.15326	80.8
	FLU	5	94.2	96.7	98.2	2.02073	96.4

## Sheet: CAT
		RAW DATA
		CAT LEAF
		TRT	R1	R2	R3	STD	Mean
	Control	1	0.4	0.6	0.7	0.152753	0.566667
	Cd	2	1.4	1.2	1.4	0.11547	1.33333
	Cd+ABA	3	0.8	0.9	0.7	0.1	0.8
	ABA	4	0.6	0.8	0.6	0.11547	0.666667
	FLU	5	0.9	0.9	1.2	0.173205	1
		CAT ROOT
		TRT	R1	R2	R3	STD	Mean
	Control	1	0.5	0.8	0.8	0.173205	0.7
	Cd	2	2.1	2.2	1.9	0.152753	2.06667
	Cd+ABA	3	0.9	1.2	1.3	0.208167	1.13333
	ABA	4	0.6	0.8	0.7	0.1	0.7
	FLU	5	1.4	1.5	1.2	0.152753	1.36667

## Sheet: CHLOROPHYLL
		RAW DATA
		CHLOROPHYLL A1
	TRET	R1	R2	R3	STD	X
	CONTROL	1.333	1.341	1.322	0.01	1.332
	Cd	0.842	0.783	0.761	0.042	0.795
	ABA	1.286	1.281	1.283	0.003	1.283
	FLU	0.463	0.524	0.379	0.073	0.455
	Cd+ABA	1.241	1.322	1.262	0.042	1.275
		CHLOROPHYLL B1
	TRET	R1	R2	R3	STD	X
	CONTROL	0.518	0.432	0.475	0.043	0.475
	Cd	0.28	0.228	0.332	0.052	0.28
	ABA	0.561	0.531	0.544	0.015	0.545
	FLU	0.185	0.172	0.159	0.013	0.172
	Cd+ABA	0.424	0.468	0.485	0.03148	0.459
		CHLOROPHYLL A1+B1
	TRET	R1	R2	R3	STD	X
	CONTROL	1.758	1.784	1.896	0.07333	1.81267
	Cd	1.122	1.011	1.093	0.05757	1.07533
	ABA	1.836	1.823	1.833	0.006807	1.83067
	FLU	0.705	0.698	0.685	0.010149	0.696
	Cd+ABA	1.665	1.79	1.747	0.063506	1.734

## Sheet: CAROTENOID
	RAW DATA
	CAROTENOID CONTENT
	TRET	R1	R2	R3	STD	X
	CONTROL	6.988	7.223	7.115	0.118	7.10867
	Cd	3.8495	3.59	4.109	0.26	3.8495
	ABA	3.523	3.48	3.566	0.043	3.523
	FLU	3.076	3.08	3.079	0.002	3.07833
	Cd+ABA	4.805	4.898	4.783	0.061	4.82867

## Sheet: PHOTOSYNTHESIS
		RAW DATA
	NET PHOTOSYNTHESIS(PN)								TRNSPIRATION RATE(TR)
	TRET	R1	R2	R3	STD	X			TRET	R1	R2	R3	STD	X
	CONTROL	5.5	5.35	5.733	0.192993	5.52767			CONTROL	3.3	3.7	3.28	0.237	3.43
	Cd	1.55	1.25	1.3	0.160728	1.36667			Cd	1.75	1.45	1.55	0.153	1.58
	ABA	6.46	6.55	6.85	0.204206	6.62			ABA	3.64	3.58	3.49	0.075	3.57
	FLU	2.2	2.6	2.4	0.2	2.4			FLU	2.8	2.9	2.5	0.208	2.73
	Cd+ABA	4.18	4.42	4.64	0.230072	4.41333			Cd+ABA	2.42	2.6	2.25	0.175	2.43
	STOMATAL CONDUCTANCE(GS)								INTERCELLULAR CO2(CI)
	TRET	R1	R2	R3	STD	X			TRET	R1	R2	R3	STD	X
	CONTROL	260.8	257.8	259.3	1.5	259.311			CONTROL	398	417	401.3	10.152	405.433
	Cd	87.7	84.9	89.8	2.458	87.4667			Cd	407.5	418	429.1	10.8014	418.2
	ABA	255.2	252.4	250.1	2.554	252.567			ABA	459.5	492.5	479.5	16.6233	477.167
	FLU	224.6	227.8	220.8	3.504	224.4			FLU	439	423.1	430	7.97308	430.7
	Cd+ABA	220	221.2	224.1	2.108	221.767			Cd+ABA	425	437.5	402	18.0069	421.5

## Sheet: RWC
	RAW DATA
	RWC OF LEAF EDITED
	TRT	R1	R2	R3	STD	X
	1	85.5	87.5	86.5	1	86.5
	2	72.6	73.4	71.2	1.11355	72.4
	3	87.6	81.9	89.6	3.99541	86.4
	4	66.8	68.6	67.9	0.907377	67.8
	5	82.7	83.5	84.3	0.816667	83.5

## Sheet: NUTRIENTS
		RAW DATA
		NUTRIENT ELEMENTS
		Mg
	TRT	R1	R2	R3	STD	X
	1	4.4	4.8	4.6	0.2	4.6
	2	2.8	2.6	2.7	0.1	2.7	41.3% < CONTROL
	3	4.3	4.6	4.7	0.2	4.5	2.2% < CONTROL
	4	2.9	3.1	3.2	0.2	3.1	32.6% < CONTROL
	5	3.6	3.6	3.8	0.1	3.7	19.6% < CONTROL
		Ca
	TRT	R1	R2	R3	STD	X
	1	7.8	7.4	7.6	0.2	7.6
	2	5.2	5.1	5.4	0.15	5.2	31.6%< CONTROL
	3	7.6	7.5	7.7	0.1	7.6	SAME AS CONTROL
	4	6.1	6.3	6.1	0.12	6.2	18.4%< CONTROL
	5	6.6	6.4	6.6	0.12	6.5	14.5%< CONTROL
		Zn
	TRT	R1	R2	R3	STD	X
	1	0.2	0.22	0.24	0.02	0.22
	2	0.08	0.09	0.12	0.02	0.1	54.5%< CONTROL
	3	0.21	0.23	0.22	0.01	0.22	SAME AS CONTROL
	4	0.11	0.12	0.09	0.02	0.11	50%< CONTROL
	5	0.19	0.17	0.21	0.02	0.19	13.6%< CONTROL
		Fe
	TRT	R1	R2	R3	STD	X
	1	0.17	0.18	0.16	0.01	0.17
	2	0.11	0.13	0.12	0.01	0.12	29.4%< CONTROL
	3	0.16	0.16	0.18	0.01	0.17	SAME AS CONTROL
	4	0.12	0.12	0.13	0.01	0.12	29.4%< CONTROL
	5	0.16	0.17	0.17	0.01	0.17	SAME AS CONTROL
		Cu
	TRT	R1	R2	R3	STD	X
	1	0.013	0.004	0.003	0.006	0.007
	2	0.003	0.002	0.003	0.001	0.003	57.1%< CONTROL
	3	0.002	0.003	0.013	0.006	0.006	14.3%< CONTROL
	4	0.002	0.002	0.001	0.001	0.002	71.4%< CONTROL
	5	0.012	0.003	0.003	0.005	0.006	14.3%< CONTROL
		Mn
	TRT	R1	R2	R3	STD	X
	1	0.42	0.46	0.47	0.03	0.45
	2	0.14	0.13	0.14	0.01	0.14	68.9%< CONTROL
	3	0.4	0.39	0.44	0.03	0.41	8.9%< CONTROL
	4	0.17	0.15	0.19	0.02	0.17	62.2%< CONTROL
	5	0.38	0.41	0.42	0.02	0.4	11.1%< CONTROL

[truncated: 3 more sheets: Cd CONTENT, FRESH WT, DRY WT]
